# Supplementary material for: Insights into early animal evolution from the genome of the xenacoelomorph worm Xenoturbella bocki
Source: PubMed Central journal article supplement (PMC11521371; doi:10.7554/elife.94948), 2024-08-07

# ILP-3 Bombixin

## IGF

## dILP 6/8

## dILP 7

## Multinsulin

## Insulin 4/5/6 GSS

## Octinsulin

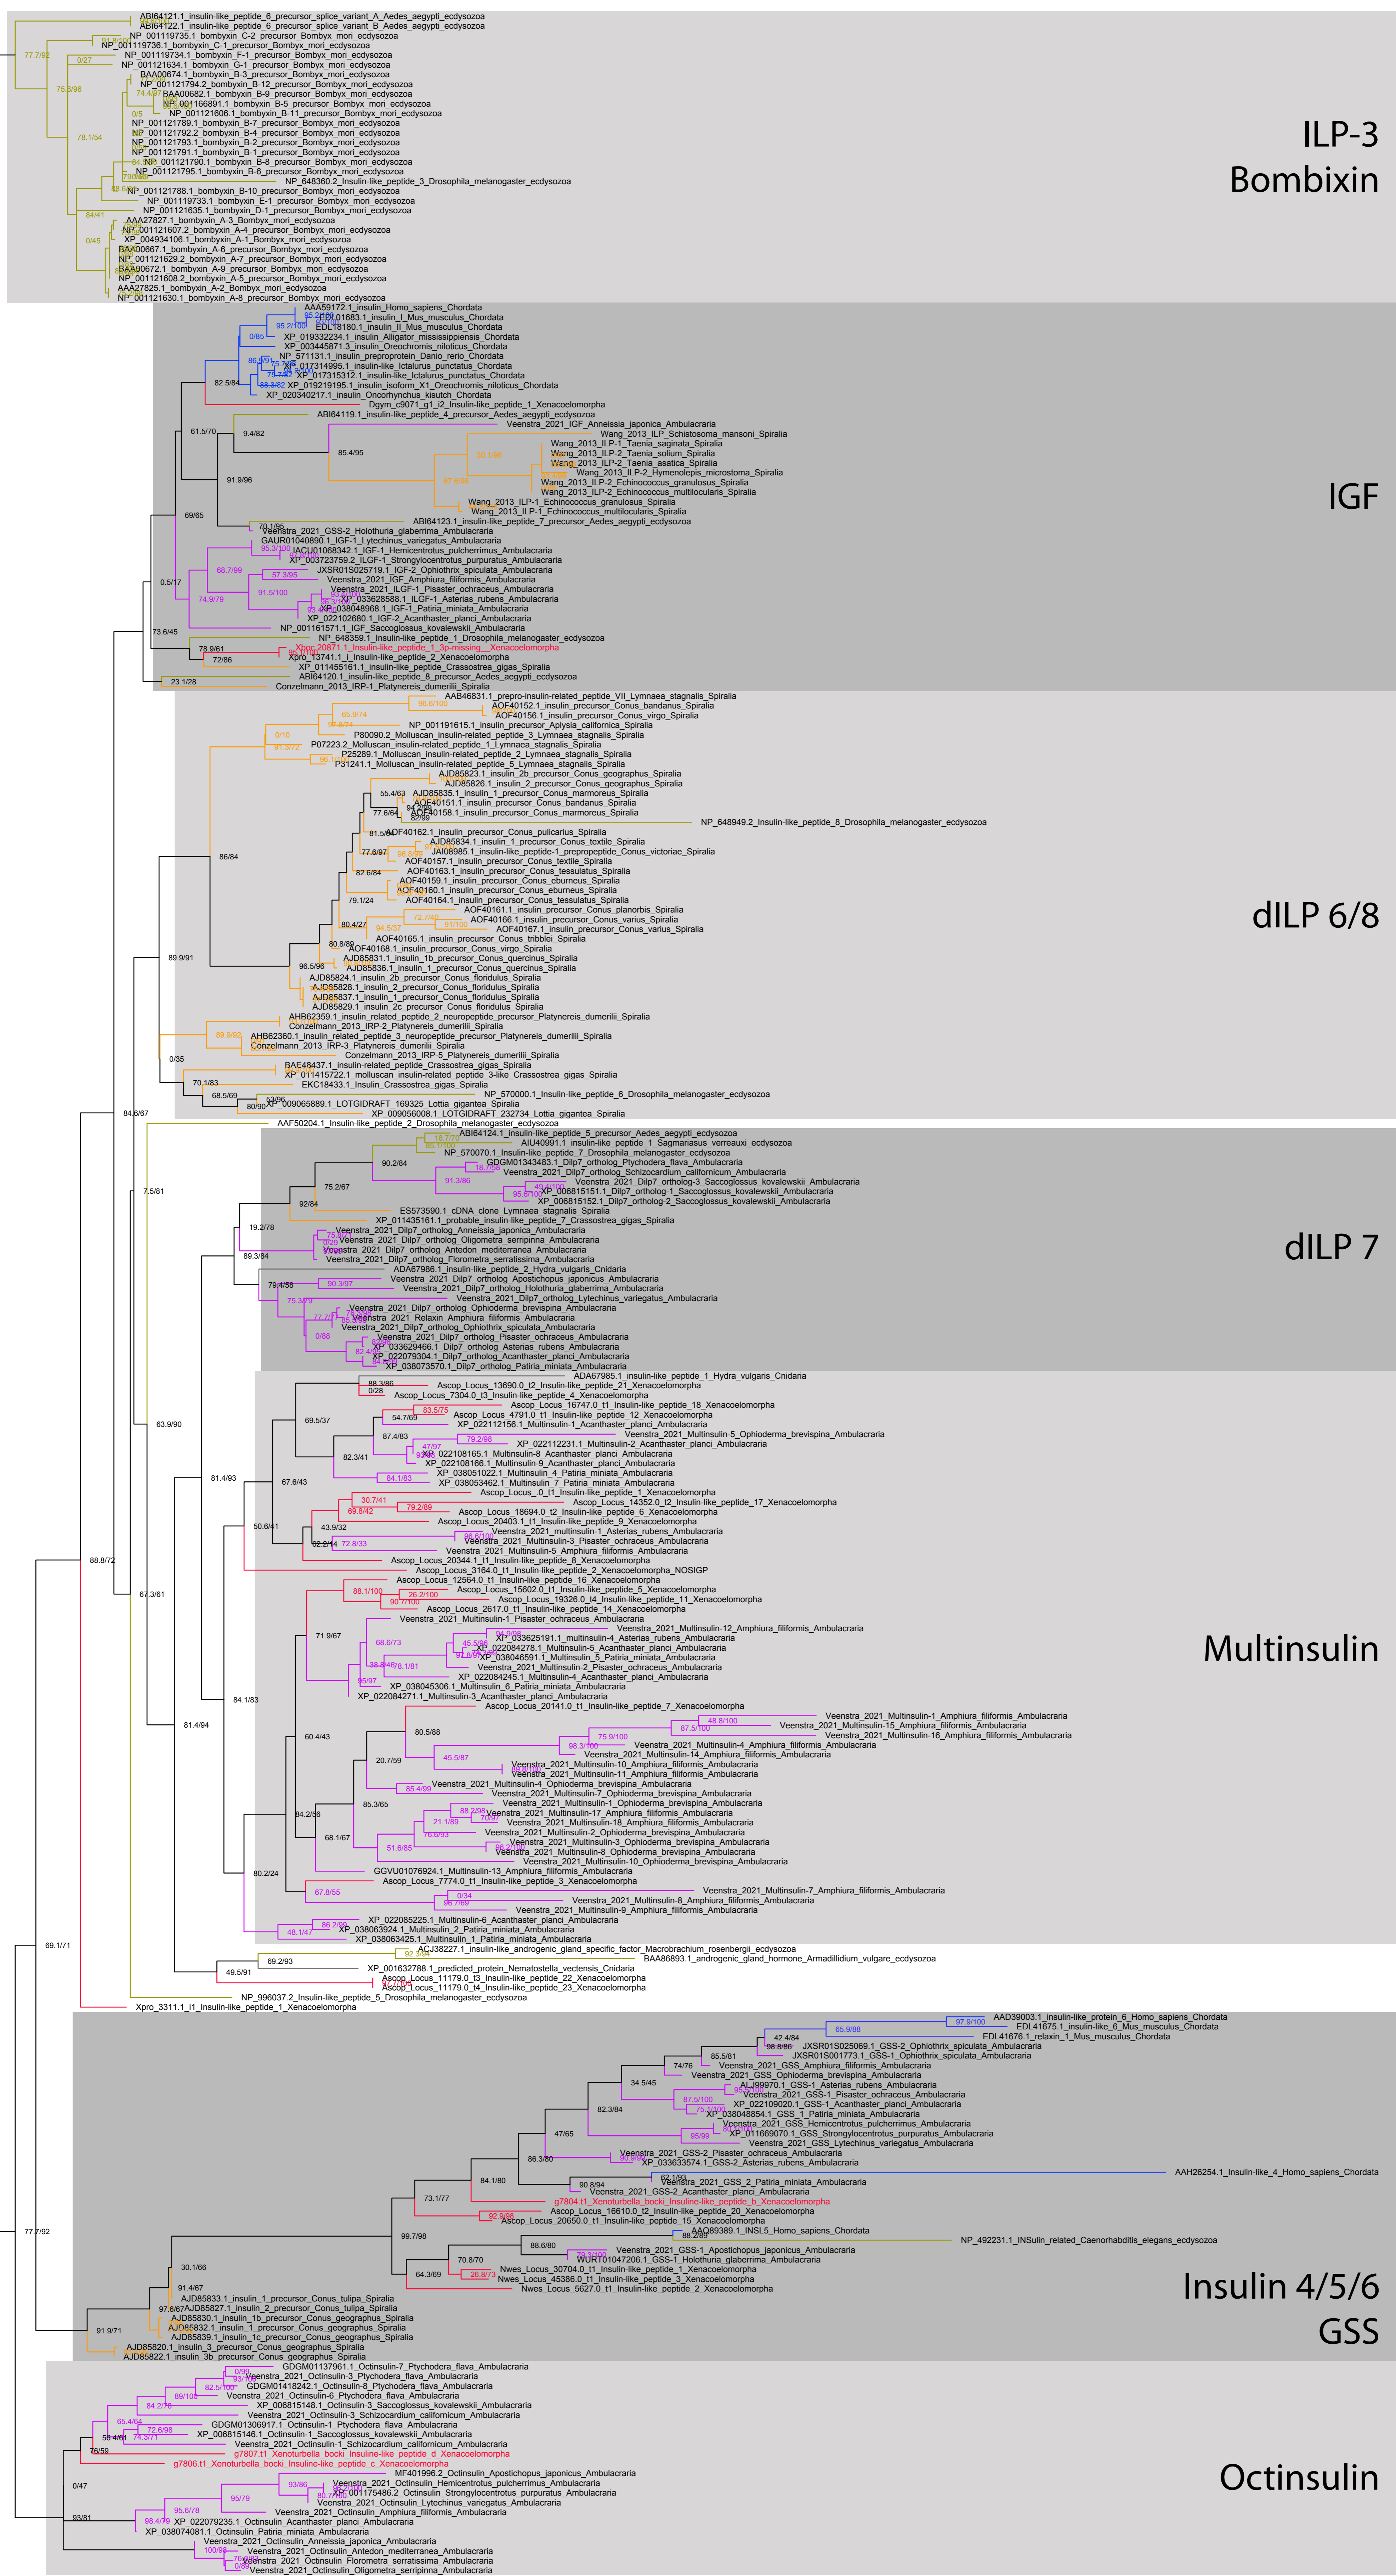

Supplement: elife-94948-supp2.pdf [file elife-94948-supp2.pdf]
