# Supplementary material for: Insights into early animal evolution from the genome of the xenacoelomorph worm Xenoturbella bocki
Source: PubMed Central journal article supplement (PMC11521371; doi:10.7554/elife.94948), 2024-08-07
Supplement: elife-94948-supp4.pdf [file elife-94948-supp4.pdf]

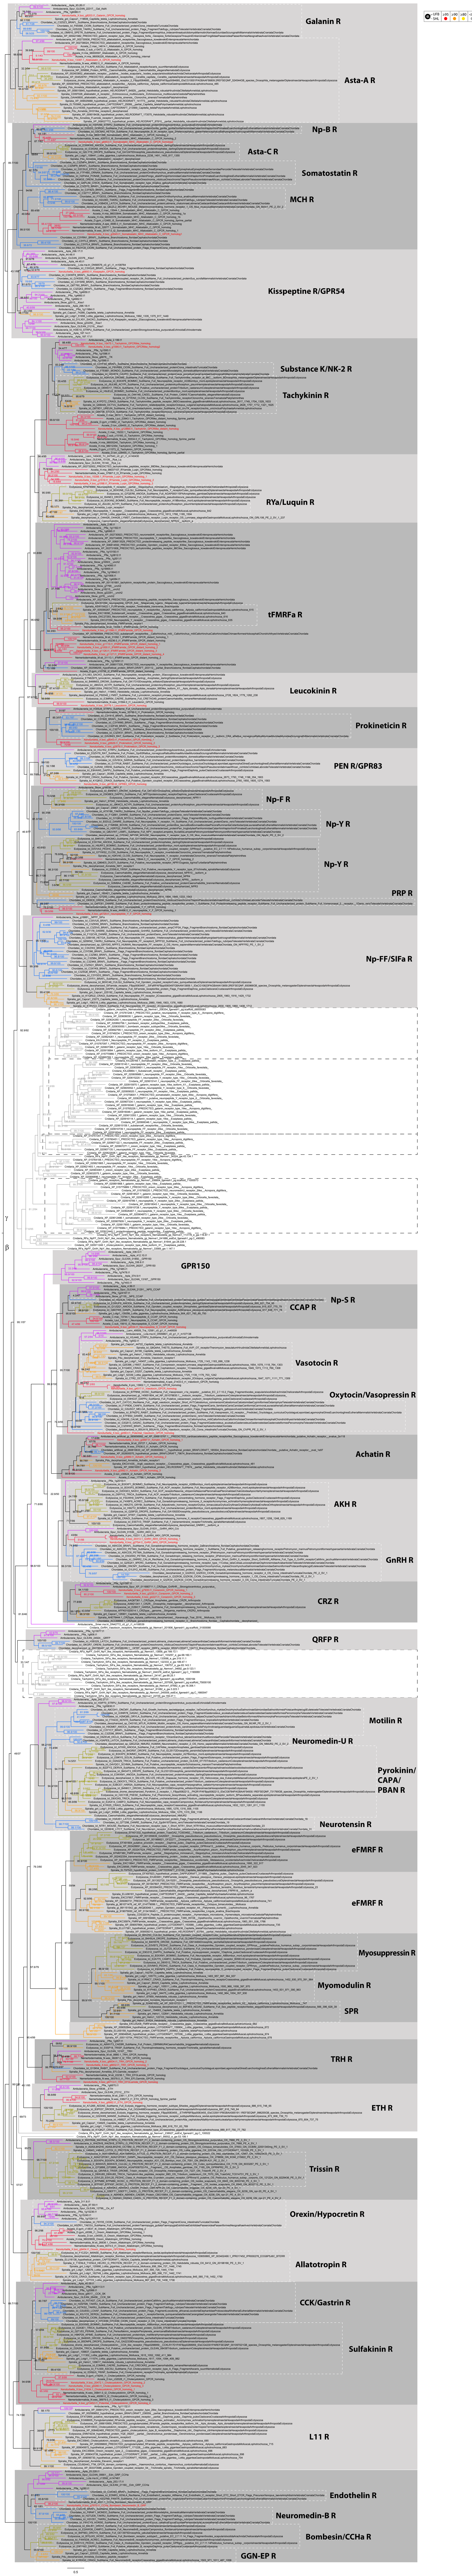

**Galanin R**

**A2A-R**

**Np-B-R**

**A2A-C-R**

**Somatostatin R**

**MCHR**

**Kisspeptin R/GPR54**

**Substance K/NK-2 R**

**Tachykinin R**

**Ry/Luquin R**

**Leucokinin R**

**Prokineticin R**

**PEN R/GPR83**

**Np-F-R**

**Np-Y-R**

**Np-Y-R**

**PRPR**

**Np-FF/SIFa R**

**CCAP R**

**Np-S-R**

**Vasotocin R**

**Oxytocin/Vasopressin R**

**Achatin R**

**AKH R**

**GnRH R**

**CRZ R**

**QRFP R**

**Motilin R**

**Neurotensin R**

**Pyrokinin/CAPA/PBAN R**

**Neurotensin R**

**eFMRF R**

**eFMRF R**

**Myosuppressin R**

**Myomodulin R**

**SPR**

**TRH R**

**ETH R**

**Trissin R**

**Orexin/Hypocretin R**

**Allatotropin R**

**CCK/Gastrin R**

**Sulfakinin R**

**L11R**

**Endothelin R**

**Neuremodin-B R**

**Bombesin/CcHa R**

**GGN-EP R**
