# Supplementary material for: Insights into early animal evolution from the genome of the xenacoelomorph worm Xenoturbella bocki
Source: PubMed Central journal article supplement (PMC11521371; doi:10.7554/elife.94948), 2024-08-07
Supplement: elife-94948-supp6.pdf [file elife-94948-supp6.pdf]

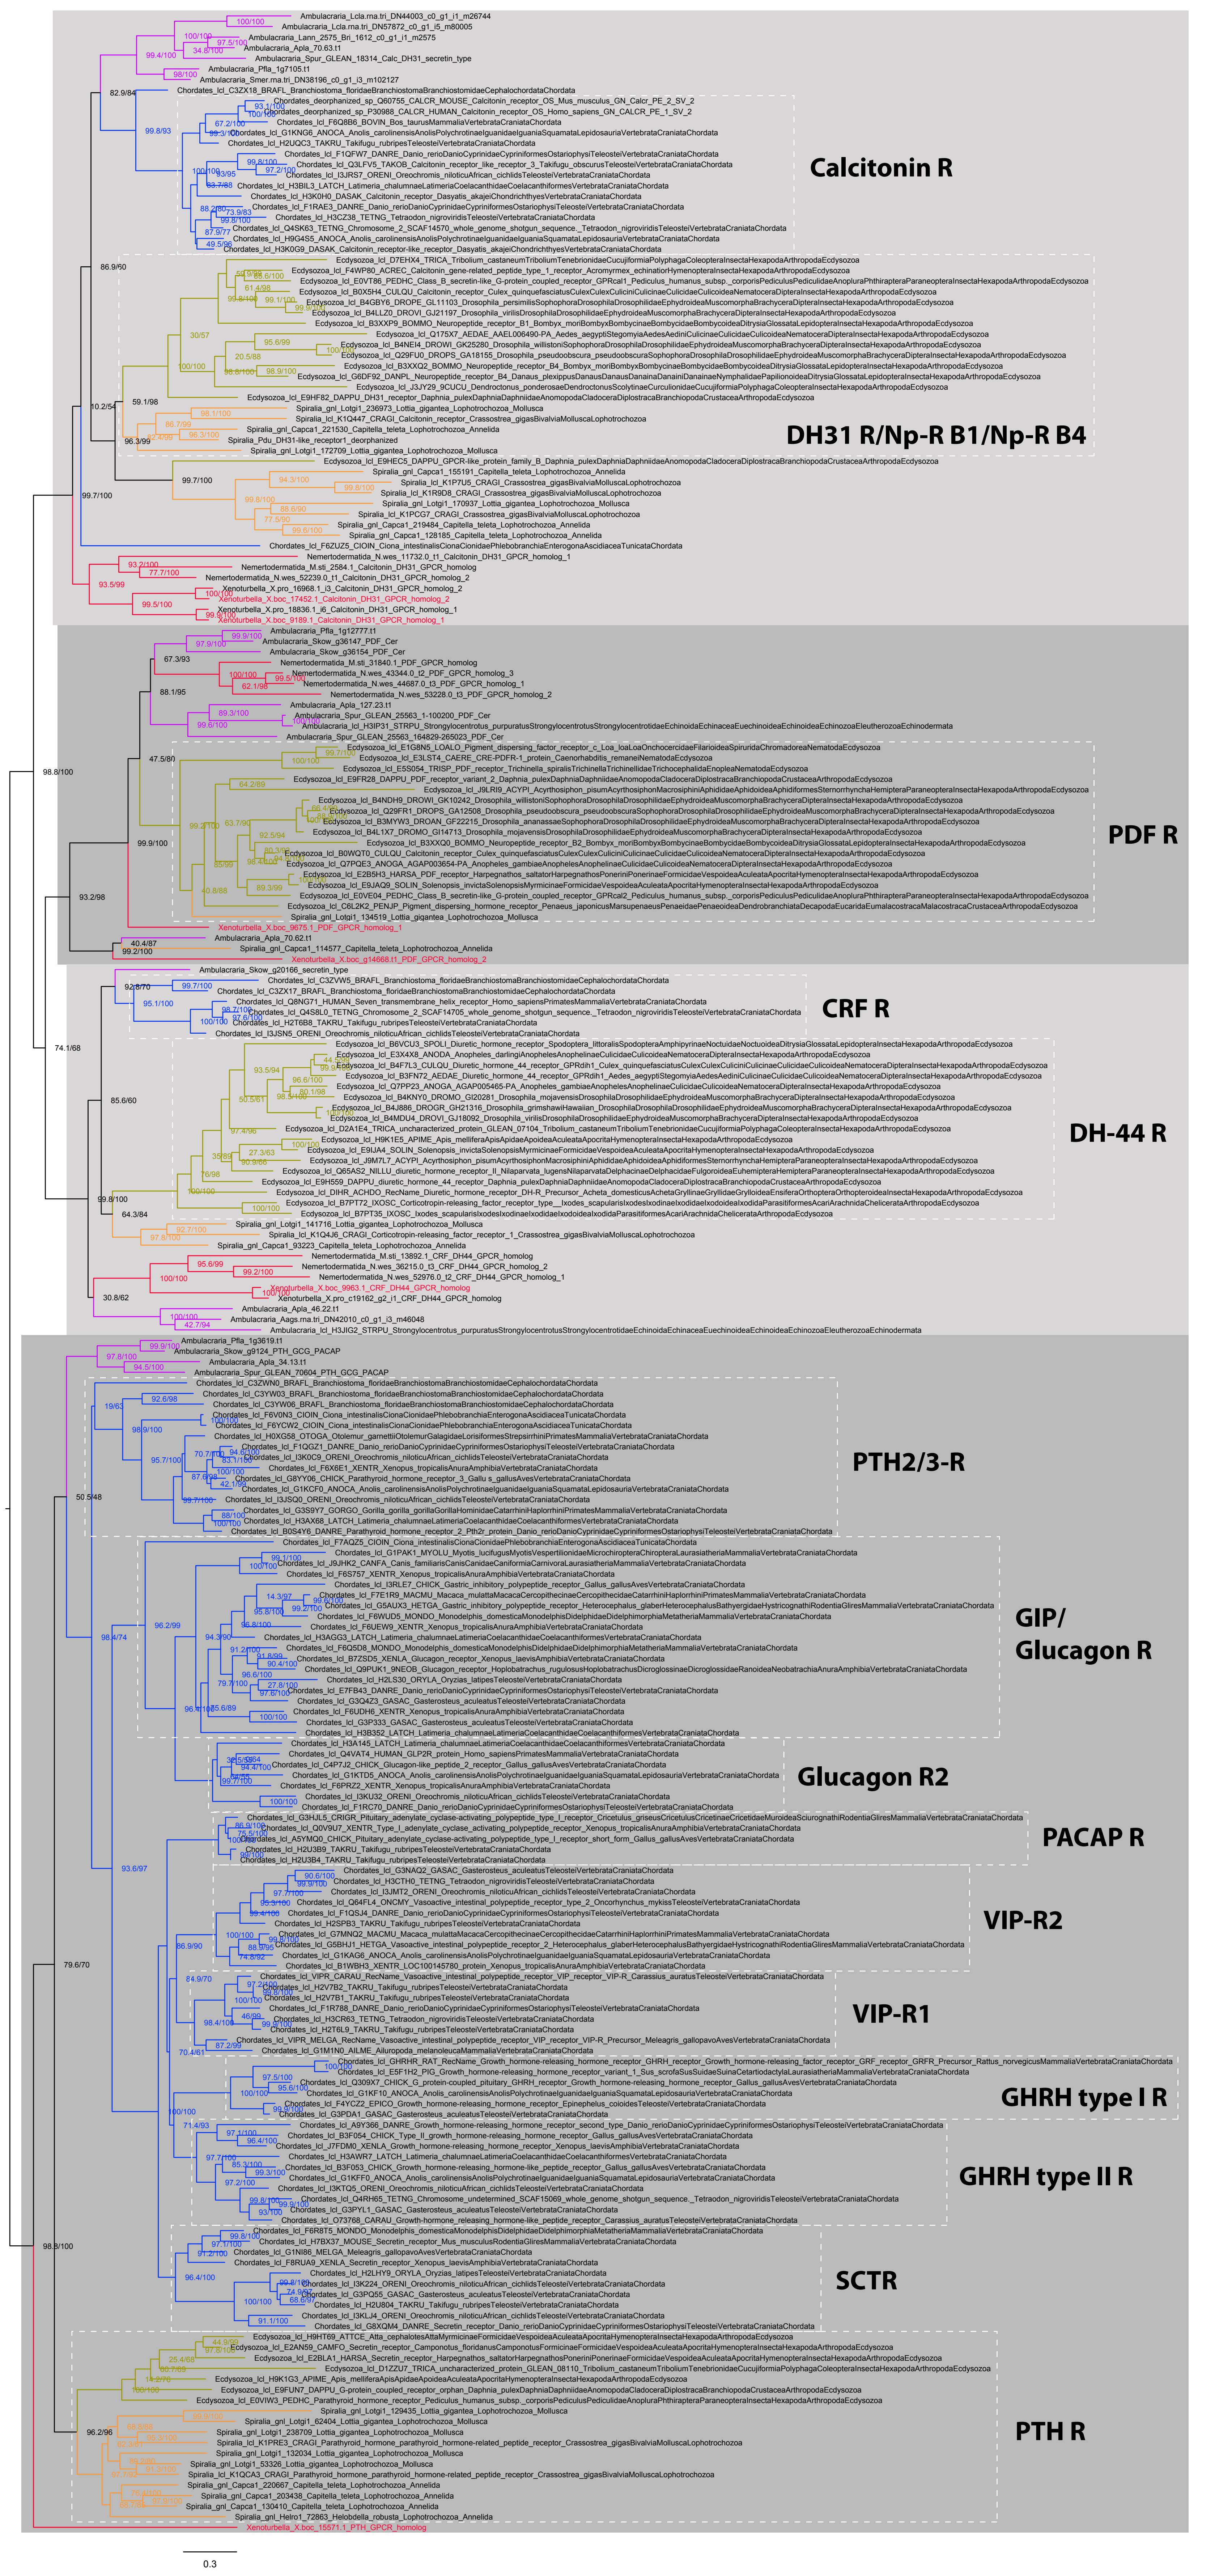

# Calcitonin R

# DH31 R/Np-R B1/Np-R B4

# PDF R

# CRF R

# DH-44 R

# PTH2/3-R

# GIP/ Glucagon R

# Glucagon R2

# PACAP R

# VIP-R2

# VIP-R1

# GHRH type I R

# GHRH type II R

# SCTR

# PTH R
