# Supplementary material for: Insights into early animal evolution from the genome of the xenacoelomorph worm Xenoturbella bocki
Source: PubMed Central journal article supplement (PMC11521371; doi:10.7554/elife.94948), 2024-08-07
Supplement: elife-94948-supp8.pdf [file elife-94948-supp8.pdf]

g2539.t1\_Xenoturbella\_bocki\_LRIGamide iso b/1-148 1 **MTCKL** **SCVLLVAFLFVCTLAAPY** **FD** **EAFLFELYNFKAALFAFEFGDFDEAKR** **LRIGSKR** 60  
 Asco\_6783.0\_t1LRIGamide/1-113 1 **MNVNCTFGLVVFVVVFSVCLSLPYRSFD** **SSESAGSPESLSNE** **SEVVRSSPLRIGGKR** 58  
 Nwes\_7201.0\_t1LRVGamide(LRIGamide)[3missing]/1-65 1 **MGTSWM** **VVAALVVMAHIV** **HSWPDSSDVDKR** **LRVGGKR** 37  
 Sterr\_c21856\_g1\_j1LRIGamide[5missing]/1-72 1 Y **QRRVRAE** **ESGDIKDR** **LRIGGKR** 23  
 Nwes\_49866.0\_t1LRIGamide\_isoform\_1/1-103 1 M **KSCIWIGVLAALVLIAYLTVTDATDEFD** **KRLRIGGKRHYSAENSAEHS** **NSVEKR** **LRIGGKR** 63  
 IpuL\_9265.1LRLQamide/1-129 1 MAS **MSGWC** **HAVLCLGAIIALFP** **THGGSGLDSG** **DQLMLGPDHIFETESTDM** **QEISPE** **DEKR** **ALRLQGKR** 71

g2539.t1\_Xenoturbella\_bocki\_LRIGamide iso b/1-148 61 **G** **AMAVRLGGKREEFDE** **DMQD** **FDKRYALRIGSRDPLRLIGSRDPEALRLIGSRDPLRIGS** 120  
 Asco\_6783.0\_t1LRIGamide/1-113 59 A **PLRIGGKR** **DDEVVWSDYE** **KRALRIGGKRA** **PLRIGG** 95  
 Nwes\_7201.0\_t1LRVGamide(LRIGamide)[3missing]/1-65 38 **SDDF** **EKRLRVGGKR** **DDD** **EEMDKR** **LRVGG** 65  
 Sterr\_c21856\_g1\_j1LRIGamide[5missing]/1-72 24 **AYD** **EKRLRIGGKR** **SDD** **DELE** **AIKR** **LRIGGKRAYD** **EKRLRIGQ** 65  
 Nwes\_49866.0\_t1LRIGamide\_isoform\_1/1-103 64 **DM** **MKRLRIGGKR** **SDD** **DSRE** **KR** **LRIGGKRDNGL** **DKRLRIGG** 103  
 IpuL\_9265.1LRLQamide/1-129 72 **ALRLQGKRGS** **GWEMRLQGRRLRQGKR** **GDE** **EELGLQDKR** **LRLQGRRLRQ** **GKRLRQG** 129

g2539.t1\_Xenoturbella\_bocki\_LRIGamide iso b/1-148 121 **KRS** **AJAVRVGGKRDPLRIGSRDPLRIGS** 148  
 Asco\_6783.0\_t1LRIGamide/1-113 96 **KRAPL** **RIGGKRAPLRIGG** 113  
 Nwes\_7201.0\_t1LRVGamide(LRIGamide)[3missing]/1-65  
 Sterr\_c21856\_g1\_j1LRIGamide[5missing]/1-72 66 **EKR** **RR** **RV** 72  
 Nwes\_49866.0\_t1LRIGamide\_isoform\_1/1-103  
 IpuL\_9265.1LRLQamide/1-129
