# Supplementary material for: Insights into early animal evolution from the genome of the xenacoelomorph worm Xenoturbella bocki
Source: eLife journal article supplement (doi:10.7554/elife.94948), 2024-08-07
Supplement: supp [file elife_poa_e94948_Figure_8_figure_supplement_4.pdf › elife_poa_e94948_Figure_8_figure_supplement_4.pdf]

## GRL-101

## dILP7/Relaxin R

## GPA2-GPB5 R

## Bursicon R

## GPCR
