# Supplementary material for: Insights into early animal evolution from the genome of the xenacoelomorph worm Xenoturbella bocki
Source: eLife. 2024 Aug 7;13:e94948. doi: 10.7554/eLife.94948 (PMC11521371; doi:10.7554/eLife.94948)
Supplement: Supplementary file 7. — The alignment highlights the presence in all sequence of aconserved ‘PPNPCP’ motif. X. bocki sequence is highlighted by a red dashed line. Sequences are available as Figure 8—source data 1; alignment is available at https://doi.org/10.5281/zenodo.6962271. [file elife-94948-supp7.pdf]

tr|W4YJ38|W4YJ38\_STRPU/1-256 1 - - - - - MWYV I L S M - L L L G A L A S - - - E Y S G M S L R D R I A L R N L M N S N Y Y D - - - - - 41  
NP\_001161654.1/1-242 1 - - - - - M M L K L L L I C G I F M T V - R G S G L G L S P A D R L A L R G L L Q E A Y Y - G - - - - - 40  
sp|P05408|7B2\_HUMAN/1-212 1 - - - - - M V S R M V S T M L S G L L F W L A S G W T P A F A Y S P - - - - - R T P D R V - - - - - 35  
XP\_019625604.1/1-239 1 M N A D K A S H L A A V T G L Y R S D V T R L L S A A - E G R V A A N V Y V R - - - - Y - M W T A - - - - - 43  
g13221.t1\_Xenoturbella\_bocki\_7B2/1-225 1 - - - - - M E P M - - - - - A M V T R L L L L L - A G A V L C Q S Y - - - - - P Y Q Q - - - - - 27  
tr|Q59E04|Q59E04\_DROME/1-276 1 M L F R - - S Q T H V F P G - - - V Y M M V A M L V V A L S G Y Q V Q S Y S A - - - - K D I L A D V L M T D L L N R M D K D M - Q - V G Y Y D V G N E A A A G 68  
tr|V5TBY3|V5TBY3\_PLADU/1-256 1 - - - - - M R T W A M T G - - - - - L A G L M L V L L V A N V R A D Y Y D D - - - - Y L - - - - - V Q D L Y K R - - - - L S Q L D D Y L A E D N E A - - - 51  
tr|A5GZV0|A5GZV0\_APLCA/1-277 1 - - - - - M N I L L L A A T L V G V T L A S Y D P - - - - - Y V - - - - - D M A Q L Y R M Q L L A N A F D D Y L P E S Q L L D S - 49

tr|W4YJ38|W4YJ38\_STRPU/1-256 42 - - - - - F P L A P S Q R D L E N T A T N S K V - V I P P L T F I A G G A G E G V Q H L G A E G D I P N R 88  
NP\_001161654.1/1-242 41 - - - - - E D E N M E S N E L - H I S P F T Y I S G G A G E G K Q Q L G P E N - I P N E 79  
sp|P05408|7B2\_HUMAN/1-212 36 - - - - - S E A D I Q R L L H G V M E Q L G I - - - - - A R P R V E - Y P A H Q A M N L - V G P Q S I E G G A H E G L Q H L G P F G N I P N I 94  
XP\_019625604.1/1-239 44 - - - - - H - - - - - R L - - - - - T R A H V E - - - - M S F F D Q K A E F V P D A G G A S E G V Q H L G P A G N I P N L 85  
g13221.t1\_Xenoturbella\_bocki\_7B2/1-225 28 - - - - - Q Q D T G T S L F K K M I D - E L - - - - - I N T R V E - Y P E T N E L P F D E T P M K V E G G T H E G G O H I G P Y G T F A N E 85  
tr|Q59E04|Q59E04\_DROME/1-276 69 S K D N V D L V S R S E Y A R L C D G G S D C I L Q S G S A S G A A S H P S L R D D E - F L Q H S S - - L - W G H Q F I S G G M G E G P - - - - - N R Y P 136  
tr|V5TBY3|V5TBY3\_PLADU/1-256 52 Y G G N S D W L D D R - - - - - I P L - - - - D S R D G T T D I R D H E - Y L E H S A - - S K G G F Q Y I S G G A G E G N Q H L T P E G T Q N N T 112  
tr|A5GZV0|A5GZV0\_APLCA/1-277 50 R S E E P Y W P E L E D V A E P - Q D D K D A I Y N - - - - D R F Y S G A H L R D Q E - H L E H S A - - L - H G Y Q S V S G G A S E V - - - - - P P N P 111

tr|W4YJ38|W4YJ38\_STRPU/1-256 89 Q N P I - - - - - P E V - S S Q Y D N P P N P C P P G G E L T - - - G K V - - - - - K V Y S 120  
NP\_001161654.1/1-242 80 K L A L - - - - - P E L D S P E Y E V P P N P C P M E L P - K - - - G R H - - - - - I V K S 111  
sp|P05408|7B2\_HUMAN/1-212 95 V A E L T G D N I - - - - - P K D F S E D Q G Y P D P P N P C P V G K T A D - - - D G C L E N T P D T A E F S R E F - - 144  
XP\_019625604.1/1-239 86 W A A M V E - - - - - S D N N R K P D A Y P N P N P C P K G Y T A E - - - D G C L E D M P D T A D F S R L Y - - 132  
g13221.t1\_Xenoturbella\_bocki\_7B2/1-225 86 H E V L T D P Y D L G Y Y S Y P P G E D S Y E S A I A T N D E P P T E E D A A E K P Y P A V N P C P I G Y S E T - - - D G C L E E V P D A A W F S K S Y - 160  
tr|Q59E04|Q59E04\_DROME/1-276 137 T I V K - - - - - N D A G L P A Y C N P P N P C P E G Y D M E T Q G G S C I V D F E N T A I F S R - - - 180  
tr|V5TBY3|V5TBY3\_PLADU/1-256 113 H E V K - - - - - S D E A L P F Y C H P P N P C P K G F T E E - - - D G C Q L D V K D T A E D Q K K W I S 157  
tr|A5GZV0|A5GZV0\_APLCA/1-277 112 K Q V K - - - - - S D K Q L P E Y C N P P N P C P V G K T A K - - - D N C V E N F D N S A E N N E R - - - 153

tr|W4YJ38|W4YJ38\_STRPU/1-256 121 K V H R H Q V C A C E K G W E A G E R R D C S - - S A P K C C L P - N M P N D A E F V N Q Y Q L S E R S L K N R Q L - - - F T Q T R N K Y - S V G D K R S D H 192  
NP\_001161654.1/1-242 112 E L F P K L E C S C S S N A S L D N N V D C A D P S V V E C C I I - N M D D L E N F V S Y F Q T Q Q G K D N G D G I A N V Q K V N K K N Q Y - H D G D K L G S L 189  
sp|P05408|7B2\_HUMAN/1-212 145 - - Q L H Q H - L F D P E H D Y - - - - - P G L - - - G K W N K K L L Y - - - - - E K M - K G E R R - - 178  
XP\_019625604.1/1-239 133 - - Q A R E E - A L R G G Q E E G A P Y S S P - - - - - R G P G G A P Y G N E I N E L E Y Y L - - - - - N P Y - R A G E K R E A V 183  
g13221.t1\_Xenoturbella\_bocki\_7B2/1-225 161 - - Q E S Q V - - - - - G K S D P E H N Y D E - - - - - N P Y - R G G E K R L E L 188  
tr|Q59E04|Q59E04\_DROME/1-276 181 E F Q A A Q D C T C D N E H M F D C S E Q D S A D V - - - - - G G D K G D L N S A V E Q Y I - M Q - - - - - M G Q E N S L N - - - - - N V N S L 236  
tr|V5TBY3|V5TBY3\_PLADU/1-256 158 K M M A S G Q C S C D E E H M F S C P K D R S T M N A D K G H E G R D D - - L D N V L D S L L A G K - - - - - M D - - - - - N P Y - S V G N K R E K M 219  
tr|A5GZV0|A5GZV0\_APLCA/1-277 154 - L L S Q Q D C P C D T E H M F S C P A G S Q T V S S K A Q S S G N Q Q M A L N K V M D E I A K M E - - - - - H D G E S L E N N P T M S E T R K R V T L 223

tr|W4YJ38|W4YJ38\_STRPU/1-256 193 M A K K S P V Y K R S I N S Y L P G D M V R H V S K K S A Y P I R T Y V N P Y T Y N Q P H L K S V V A K K A P V Y S G A K P I M - - - - - 256  
NP\_001161654.1/1-242 190 V A K K S P R K Y K R D - S Y E - - - - - L A E R F A R R A N R Y L D G Q D H I N S V V A K K S P R Y L D P N G T F M - - - - - 242  
sp|P05408|7B2\_HUMAN/1-212 179 - - - - - K - - - - - R R S V N P Y L Q G Q R L - D N V V A K K S V P H F S D E D K D P E - - - - - 212  
XP\_019625604.1/1-239 184 V A K K S P L Y L R R R S L G L S S A V - - - - - A M E T D E R E D N P F F K G E K L - R H V A A K K S P E - L S R Q K R Y - - - - - 239  
g13221.t1\_Xenoturbella\_bocki\_7B2/1-225 189 V A K K A P I I R R K R S A G P - - - - - N P Y L N G V K T - R T V A K - K S P T - I R - - - - - 225  
tr|Q59E04|Q59E04\_DROME/1-276 237 A K K A G Y P V M P D P R L - - - - - D D A V I N P F L Q G D R L - P I A A K K G N L L F H - - - - - 276  
tr|V5TBY3|V5TBY3\_PLADU/1-256 220 V A K K G - - - - - H P G - - - - - N L N L G N P F L D G Q V V - H T V A K K G G V G S V M M K - - - - - 256  
tr|A5GZV0|A5GZV0\_APLCA/1-277 224 V A K K S P H I I H K R S E - - - - - Q S D H S N P F L Q G A P V - A I A A K K D P N T A Q R V I P Q W A R Y D Q P L R 277
