# Supplementary material for: Insights into early animal evolution from the genome of the xenacoelomorph worm Xenoturbella bocki
Source: eLife. 2024 Aug 7;13:e94948. doi: 10.7554/eLife.94948 (PMC11521371; doi:10.7554/eLife.94948)
Supplement: Supplementary file 9. — X. bocki sequence is highlighted by a reddashed line. Sequences are available as Figure 8—source data 1; alignment is available at https://doi.org/10.5281/zenodo.6962271. [file elife-94948-supp9.pdf]

1 -MGMLEWKLPLLLLLIVHV- AQAPVDPKPAEEDRRDDEEGEIGAGEE 45  
 1 -MAKWHYLLGLSLLVL- CNALPVYPKEPVEEEKPEE 47  
 1 -MMNLWREILLLLVLIAL- CQAPVLDKKVEESESLE 35  
 1 -MGVMLPVNAVILVMVTDMSAAPSPTEFNTPO- 42  
 1 -MMRWRTLLQYCFLLILCLLTALE- AVPIDIKETKTQNHHPVE 44  
 1 MLTFALMLTCSFHQIKKETSLSL- FLLTSRMVLRRCLLLAALVL-LVSHDAMLAPVDPKKQGA-EEGAE 65  
 1 -MDRPAISFSL- KKSVALIFFAFAFAAIVVTV- VGGPPVSEKAGVIV-DDD 52  
 1 -MVQNVALGLLALIAI- AS- IVALPTQNKKDHKEAES- 38  
 1 -MRH-ILYVFVVCFAI- QG- ICPVNNQNPTPK- 30

38 I L N I A E G D Q I A D L G L Y E F R L E V I Q V L E A P D E M S H M D M O D N D L L T G K F G K L N N V S H I R G L D L K K K E I Q R L R I 1259  
39 --- - - - - - L L D E D T G L Y D R Y I R V I K V L E K D P M R K R E E M S L D K E G N F A R G L G L F S S N I R S K L D E L K R M E V Q R L R T V 1107  
36 --- - - - - - E E V E N T L G L Y E R Y L R M V Y K L L N D P E M K K K L D D L S L D D L K G M S E I M G V S Q K L I A R L D D L K R T L E L R Q L R Q 109  
35 --- - - - - - N D T G K L D A L E Y E R Y Q V I E V L E T D K N E K I N N A P D D I R T G K I A N E L K E V K V N H R K L D E L K R E I D M R T V 1109  
43 --- - - - - - S A K I E L P D T G L Y D E Y L R Q V I D V L E T K H F R E K L K A D I E E I K S G R L S K E L V D L V S H V R T K L D E L K R Q E V G R L R M L 118  
50 --- - - - - - T N K E S L G L G L H Y D S L G L V V R V L E T D P E F K K K L E A D I E D I K S G L A A L N L V A H N V S Q L D E L K R E V T L R K L 145  
73 --- - - - - - A N S T E E S L G L E Y R Y M R V E V K L L E D E E F K R K L E A N S I D K S G A I A Q H L N V S K I R S L D E L K R N E L R L R T V 1287  
39 --- - - - - - T P A T A D E T A L E Y E R Y L E V V E A L E A D P F R K K L D K E A D I R S K G L I A Q L I V N H H V T K L D E I K R R E V N R L R L 114  
31 --- - - - - - E E K K D D D T G L Y D R Y L E V V E L L E D P E F K R K L E E A N V T I K S G K I A M H L E K V A H V R E K L D E I K R E V N R L R L 106

112 K A M E E Q A A L G K A \_ \_ \_ K P D O K F L N L I G H L D P S S M D A K S \_ \_ D D I T L K I Q A A T K L D L E A D Q R R K F K R Y E M K E L K R S \_ \_ \_ 187  
113 A K R M E A A T G T G L \_ \_ \_ R R M D O K L G M V G H V D P A M D K F T D T D F E K L I K A A A D L E A D Q R R K F K R Y E M K E L K R S \_ \_ \_ 187  
114 Q R E Q Q A \_ \_ N H \_ \_ \_ R S M D O K S L D M V G H L I D I N S M D T G G K D P E K L L K A T F E L D L D K A S A \_ \_ Q E F K R Y E M K E L K R R \_ \_ \_ 182  
110 L K E A L E R G L S L E A \_ \_ \_ \_ \_ E E F K E M L S H M D H E N P D K E T S D L E L K I K A Y D L E Q M S Q A D D F K K Y E M K E V K R R \_ \_ \_ 182  
119 I K A L S L D Q D L G \_ \_ \_ \_ \_ M D H A L L K O F D H L N L N P D K F E S T D L M L I K A A T S D L E H V D K T H E F E F K Y E M M K E H E R R E \_ \_ \_ 191  
120 Q V L M Q M Q N G R N G L H K G D L R V \_ \_ K M Y E E N V H D S N P S F F E E D L L K I Q A V N D L E N Y D K Q H L F E F K R Y E M K E H R R E \_ \_ \_ 225  
129 L K L V R Q A Q S G D R L \_ \_ \_ P P P \_ \_ A L H E L K F L G H V D S N Q H S F T E T K L V L K I R T \_ \_ D D L E D I D R R R E D F K R Y E M K E H L R R E \_ \_ \_ 225  
115 A N G A R L S N D \_ \_ \_ \_ \_ I D K L I S V L S Q H L D N E H T F E I E D R L K I Q A T S D D L A A A D R K R R G F E F K Y E M K E F E R A \_ \_ \_ 184  
107 A E M K M Q M G \_ \_ \_ \_ \_ \_ \_ \_ \_ I Q K I D E S L V H V D V N P H S F E M K L E R L I Q K T K L D L E A D L Q K R R E F K N Y L E K E H R R E \_ \_ \_ 176

|     |          |    |      |       |     |       |      |      |        |     |      |     |     |      |    |    |    |    |    |    |    |    |     |
|-----|----------|----|------|-------|-----|-------|------|------|--------|-----|------|-----|-----|------|----|----|----|----|----|----|----|----|-----|
| 102 | LRMRNNEE | EA | AMEN | EYKRR | EMQ | HAKLN | HPGS | KQLE | EEWVEE | DHL | DKDF | NP  | FKT | FD   | NS | DS | DG | LF | DE | FE | LE | AL | 281 |
| 103 | D        | ML | T    | LA    | AAQ | YKAE  | AE   | FN   | RRDL   | LN  | HPGS | KAQ | RD  | VWEE | E  | D  | L  | PK | DF | NP | FF | AL | 282 |
| 104 | LRMRNNEE | EA | AMEN | EYKRR | EMQ | HAKLN | HPGS | KQLE | EEWVEE | DHL | DKDF | NP  | FKT | FD   | NS | DS | DG | LF | DE | FE | LE | AL | 283 |
| 105 | K        | ML | T    | LA    | AAQ | YKAE  | AE   | FN   | RRDL   | LN  | HPGS | KAQ | RD  | VWEE | E  | D  | L  | PK | DF | NP | FF | AL | 284 |
| 106 | LRMRNNEE | EA | AMEN | EYKRR | EMQ | HAKLN | HPGS | KQLE | EEWVEE | DHL | DKDF | NP  | FKT | FD   | NS | DS | DG | LF | DE | FE | LE | AL | 285 |
| 107 | K        | ML | T    | LA    | AAQ | YKAE  | AE   | FN   | RRDL   | LN  | HPGS | KAQ | RD  | VWEE | E  | D  | L  | PK | DF | NP | FF | AL | 286 |
| 108 | LRMRNNEE | EA | AMEN | EYKRR | EMQ | HAKLN | HPGS | KQLE | EEWVEE | DHL | DKDF | NP  | FKT | FD   | NS | DS | DG | LF | DE | FE | LE | AL | 287 |
| 109 | K        | ML | T    | LA    | AAQ | YKAE  | AE   | FN   | RRDL   | LN  | HPGS | KAQ | RD  | VWEE | E  | D  | L  | PK | DF | NP | FF | AL | 288 |
| 110 | LRMRNNEE | EA | AMEN | EYKRR | EMQ | HAKLN | HPGS | KQLE | EEWVEE | DHL | DKDF | NP  | FKT | FD   | NS | DS | DG | LF | DE | FE | LE | AL | 289 |
| 111 | K        | ML | T    | LA    | AAQ | YKAE  | AE   | FN   | RRDL   | LN  | HPGS | KAQ | RD  | VWEE | E  | D  | L  | PK | DF | NP | FF | AL | 290 |
| 112 | LRMRNNEE | EA | AMEN | EYKRR | EMQ | HAKLN | HPGS | KQLE | EEWVEE | DHL | DKDF | NP  | FKT | FD   | NS | DS | DG | LF | DE | FE | LE | AL | 291 |
| 113 | K        | ML | T    | LA    | AAQ | YKAE  | AE   | FN   | RRDL   | LN  | HPGS | KAQ | RD  | VWEE | E  | D  | L  | PK | DF | NP | FF | AL | 292 |
| 114 | LRMRNNEE | EA | AMEN | EYKRR | EMQ | HAKLN | HPGS | KQLE | EEWVEE | DHL | DKDF | NP  | FKT | FD   | NS | DS | DG | LF | DE | FE | LE | AL | 293 |
| 115 | K        | ML | T    | LA    | AAQ | YKAE  | AE   | FN   | RRDL   | LN  | HPGS | KAQ | RD  | VWEE | E  | D  | L  | PK | DF | NP | FF | AL | 294 |
| 116 | LRMRNNEE | EA | AMEN | EYKRR | EMQ | HAKLN | HPGS | KQLE | EEWVEE | DHL | DKDF | NP  | FKT | FD   | NS | DS | DG | LF | DE | FE | LE | AL | 295 |
| 117 | K        | ML | T    | LA    | AAQ | YKAE  | AE   | FN   | RRDL   | LN  | HPGS | KAQ | RD  | VWEE | E  | D  | L  | PK | DF | NP | FF | AL | 296 |
| 118 | LRMRNNEE | EA | AMEN | EYKRR | EMQ | HAKLN | HPGS | KQLE | EEWVEE | DHL | DKDF | NP  | FKT | FD   | NS | DS | DG | LF | DE | FE | LE | AL | 297 |
| 119 | K        | ML | T    | LA    | AAQ | YKAE  | AE   | FN   | RRDL   | LN  | HPGS | KAQ | RD  | VWEE | E  | D  | L  | PK | DF | NP | FF | AL | 298 |
| 120 | LRMRNNEE | EA | AMEN | EYKRR | EMQ | HAKLN | HPGS | KQLE | EEWVEE | DHL | DKDF | NP  | FKT | FD   | NS | DS | DG | LF | DE | FE | LE | AL | 299 |
| 121 | K        | ML | T    | LA    | AAQ | YKAE  | AE   | FN   | RRDL   | LN  | HPGS | KAQ | RD  | VWEE | E  | D  | L  | PK | DF | NP | FF | AL | 300 |
| 122 | LRMRNNEE | EA | AMEN | EYKRR | EMQ | HAKLN | HPGS | KQLE | EEWVEE | DHL | DKDF | NP  | FKT | FD   | NS | DS | DG | LF | DE | FE | LE | AL | 301 |
| 123 | K        | ML | T    | LA    | AAQ | YKAE  | AE   | FN   | RRDL   | LN  | HPGS | KAQ | RD  | VWEE | E  | D  | L  |    |    |    |    |    |     |

|     |   |   |   |   |   |   |   |   |   |   |   |   |   |   |   |   |   |   |   |   |   |   |   |   |   |   |   |   |   |   |   |   |   |   |   |   |   |   |   |   |   |   |   |   |   |   |   |   |   |   |   |   |   |   |   |   |   |   |   |   |   |     |     |   |     |     |     |     |   |   |     |
|-----|---|---|---|---|---|---|---|---|---|---|---|---|---|---|---|---|---|---|---|---|---|---|---|---|---|---|---|---|---|---|---|---|---|---|---|---|---|---|---|---|---|---|---|---|---|---|---|---|---|---|---|---|---|---|---|---|---|---|---|---|---|-----|-----|---|-----|-----|-----|-----|---|---|-----|
| 282 | K | E | V | E | K | V | K | K | D | K | - | T | A | D | V | E | E | L | S | M | R | M | E | H | V | N | O | - | I | D | N | N | K | D | M | V | S | E | F | L | A | M | E | A | S | A | S | D | F | E | E | D | - | S | E | W | E | D | L | N | E | S   | S   | F | T   | E   | G   | L   | D | - | 358 |
| 286 | K | E | V | E | K | I | Y | Q | D | K | - | A | D | D | P | R | E | E | I | S | S | M | R | E | H | V | L | R | E | - | L | D | L | G | K | M | V | S | E | E | F | L | A | A | D | Q | T | F | E | N | D | - | G | W | K | D | I | N | E | E | F | T   | E   | L | Q   | -   | 343 |     |   |   |     |
| 267 | V | K | E | V | K | M | S | D | S | - | N | A | D | P | K | E | L | E | L | S | M | R | E | H | V | M | N | E | - | L | D | L | G | K | M | V | S | E | E | F | L | A | A | D | S | D | F | E | E | - | K | G | W | E | D | L | E | F | K | I | Y | T   | E   | E | L   | -   | 342 |     |   |   |     |
| 266 | K | E | V | E | K | V | K | S | E | - | E | D | D | M | E | E | F | E | E | M | N | R | E | H | V | M | T | E | - | V | D | L | G | K | L | S | E | E | F | L | A | A | Q | N | S | D | E | K | - | D | G | W | E | T | E | D | L | E | E | L | - | 348 |     |   |     |     |     |     |   |   |     |
| 272 | T | K | E | L | V | Y | D | P | K | N | E | - | E | D | D | M | V | E | E | E | R | L | A | M | E | H | V | M | N | E | - | V | D | T | N | O | R | L | V | - | L | E | E | F | L | K | A | E | K | K | E | F | L | - | D | S | W | E | L | D | E | E   | L   | - | 349 |     |     |     |   |   |     |
| 288 | K | E | V | E | K | V | K | E | N | - | E | D | D | L | R | E | E | E | A | R | M | K | H | V | L | N | E | - | D | D | S | R | V | S | F | T | E | F | I | A | I | - | K | R | E | E | F | E | E | F | E | E | - | F | E | D | T | D | F | F | E | E   | L   | - | 345 |     |     |     |   |   |     |
| 286 | K | E | L | D | V | Y | N | A | T | - | E | D | D | M | E | R | Y | E | E | M | N | R | H | V | K | E | I | - | D | A | N | S | D | S | E | E | F | L | S | E | F | V | N | - | K | R | E | E | F | F | K | D | - | E | E | W | T | E | D | L | E | F   | E   | L | -   | 365 |     |     |   |   |     |
| 265 | V | K | E | L | V | Y | Q | S | L | D | - | P | E | D | D | M | R | E | A | E | E | M | S | H | V | F | Q | E | - | D | M | N | H | D | G | L | S | I | D | E | F | M | V | - | N | K | E | F | F | K | D | - | P | E | W | E | T | I | D | R | Q | Y   | T   | H | E   | L   | -   | 344 |   |   |     |
| 257 | K | E | L | D | V | Y | D | N | N | P | - | E | D | D | M | E | R | E | E | S | M | R | H | V | K | E | I | - | D | L | S | M | D | K | D | G | L | V | S | M | D | E | F | M | Q | Y | K | S | E | D | E | N | K | - | E | G | W | T | L | E | E | -   | 342 |   |     |     |     |     |   |   |     |
| 265 | K | E | L | D | V | Y | D | N | N | P | - | E | D | D | M | E | R | E | E | S | M | R | H | V | K | E | I | - | D | L | S | M | D | K | D | G | L | V | S | M | D | E | F | M | Q | Y | K | S | E | D | E | N | K | - | E | G | W | T | L | E | E | -   | 342 |   |     |     |     |     |   |   |     |

359 KYCEELRLTLEETAKMAKAGD--NFVRVRQPQGGQDANNMNA--QAGQIKDGLSLAGLPAKKEGND  
 360 ---YNNRMVNERLER-----3755  
 369 TFEKLEPEMSRLKLMQDEHE--AFKQKQKGGGA--VKMSQGGTLNAEQL--ADALNNAADKEAFENFQQAHE  
 343 LKPEELRKEEELPQKKELEL-----LQQQ-----3765  
 350 EYENITALENELKKADLELQK-----KEL-----3765  
 385 EFEQQLAKENELQKEYLELAR-----KRAEH-----4115  
 366 AFKDLNLRQHASDVT-----PPPTTTLMSQGGGHHDD-----QQQQHV  
 343 EYERMLEEVEERLRAQQGAPP--HPNMP-----AAPPGGGVAYQAPPGAQ-----LHYQH  
 335 EYRRRLKEEERRQQGALNSHAQGLLVNQPPHPHPVNNQMQMQQGGFHGGMGPPGGGMMHGCGM-----PQQH  
 335 -----4055

422 KIRFEGD-----TQEVTRHDPGNGIAAAN-----GQPPPPAGQPPPPAGQ 463

470 QIQINLVNQAKVLAEKAMKEKAAEAAVQAOQLKAREFVKQQQQQADPQAQLKVQQEQAGLKAQFAQLKAQQFAQLKAQA 487

370 -----EALRQRT-----ASR-----PD 382

377 -----QRRHQLAQAQLLEYHGVIG-----QMEQK-----KL 403

417 -----QQRQLLQVKKMQKQVVQ-----MSDQ-----DR 438

403 DQQQHVVDQQ-----QQQHVQDQDQDQDQHVVDQQQHQDDQQQQHQDDQQQQHVVDQQQHVVDQQQ-----QDQRLHFE 473

397 DQQQHVVDQQ-----QQQHVQDQDQDQDQHVVDQQQHQDDQQQQHQDDQQQQHVVDQQQHVVDQQQ-----QDQRLHFE 473

406 DQVAAAMQQQQ-----AQFHAQAQAQFHAQAQAQ-----LQPNQVYQ-----H-----AGQIPQDQ-----VYQNGPVVYQQ 462

409 DQVAAAMQQQQ-----AQFHAQAQAQFHAQAQAQ-----LQPNQVYQ-----H-----AGQIPQDQ-----VYQNGPVVYQQ 462

464 PQQ --- PPAGQ PQ --- Q --- PPA --- SQPPPPP ASDQQGQ --- 491

488 QQAAQQQAQQQAQ --- -- QQALQLA --- -- QQQAQLAQAKQAQQAAQQQAQ 528

483 RTPEPPPLEVEV --- P --- LDGGGEGLFDEL LYPK --- -- 518

404 GIPRSG --- -- AGEL --- KFERREVSF --- 515

439 PAEAAEQESDQAAAGQEAVPAAEAHAADGGGP --- AEVHELEVAVVDQDAI AVGGNLPPFGNGEQAQQ --- 525

474 P - HDQPKGV --- I --- 484

463 PVYQQQGFVQQG --- -- QKRPVQPVQ --- 486

471 GATGGGPPVGQTQ --- QAQGPPAQAAGQGV --- YVQGQVS VQGQPVVGQVRDPV QRQ 525

492 ..... QQQQQQQQQNQ P P P P K Q P A Q Q P ..... 513

529 Q A Q Q Q A Q Q Q A Q Q Q A Q Q Q A Q Q Q \_ A Q Q Q A Q Q Q A Q Q Q A Q Q Q A Q Q Q A Q Q Q G G A R A P A D G N P P G A Q ..... 598

512 ..... Q Q E A Q Q P T T ..... 520

487 Q P V Q Q Q Q Q P V Q Q Q Q Q T V Q Q Q Q Q T V \_ - Q Q Q Q P V Q Q Q Q Q T A Q Q Q P V A Q Q Q I H N Q S P P P V L N Q Q V P V Q Q Q Q K Q H Q S ..... 564

526 P V Q G Q - P V Q Q G Q P Q Q T G V P G Q G Q Q Q Q G Q Q Q Q Q G Q A Q Q Q Q G H D Q K P V A ..... 575
