# Supplementary figures and images for: Insights into early animal evolution from the genome of the xenacoelomorph worm Xenoturbella bocki
Source: eLife journal article supplement (doi:10.7554/elife.94948), 2024-08-07

Figure 10 – supplement 1.

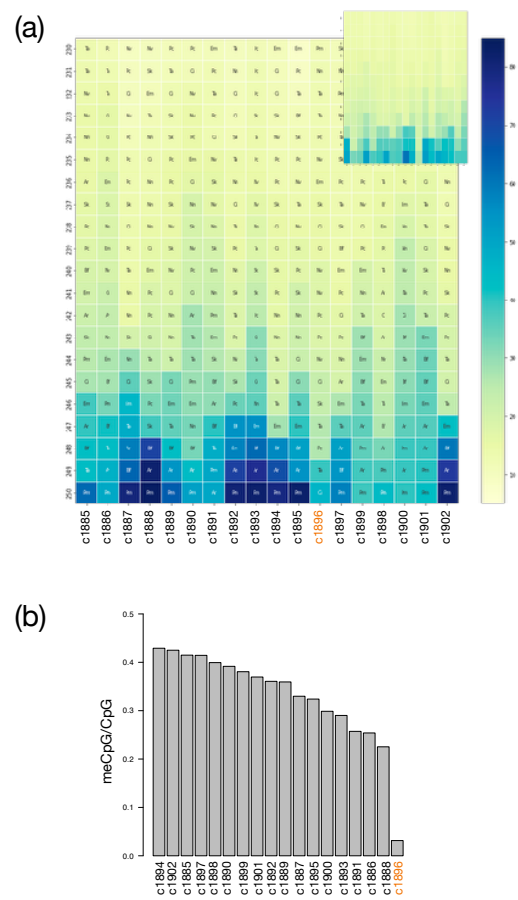

Supplement: supp [file elife_poa_e94948_Figure_10_figure_supplement_1.pdf › elife_poa_e94948_Figure_10_figure_supplement_1.pdf]

Figure 10 – supplement 2.

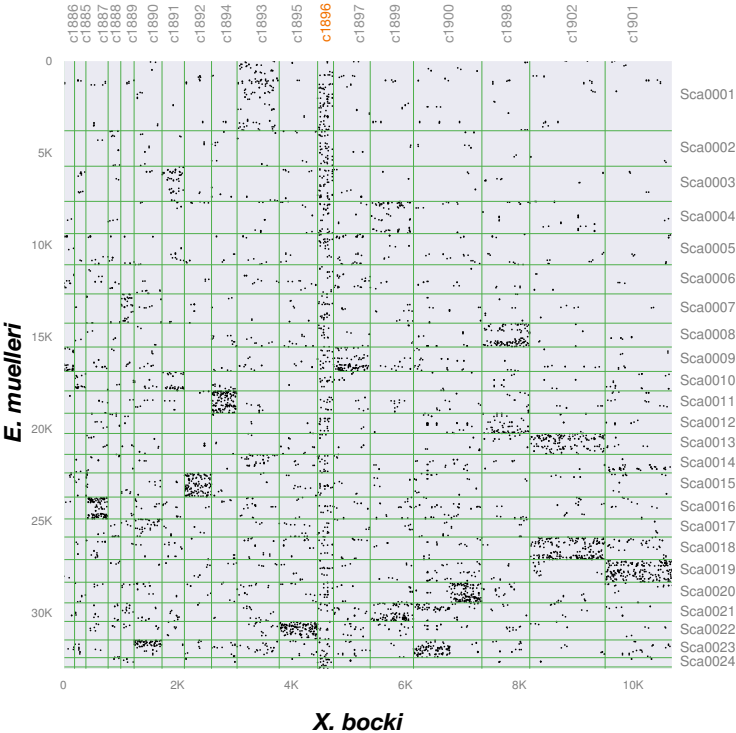

Supplement: supp [file elife_poa_e94948_Figure_10_figure_supplement_2.pdf › elife_poa_e94948_Figure_10_figure_supplement_2.pdf]

**Figure 13 – figure supplement 1**

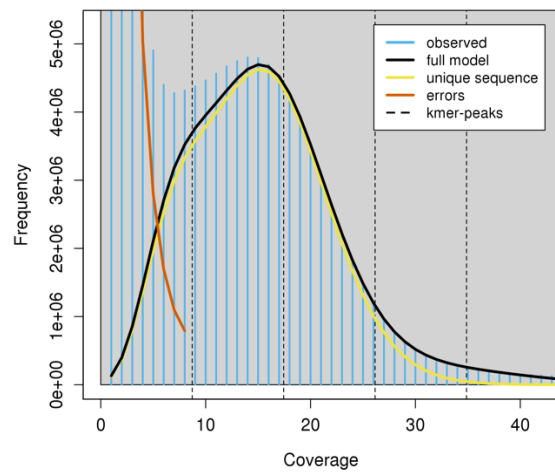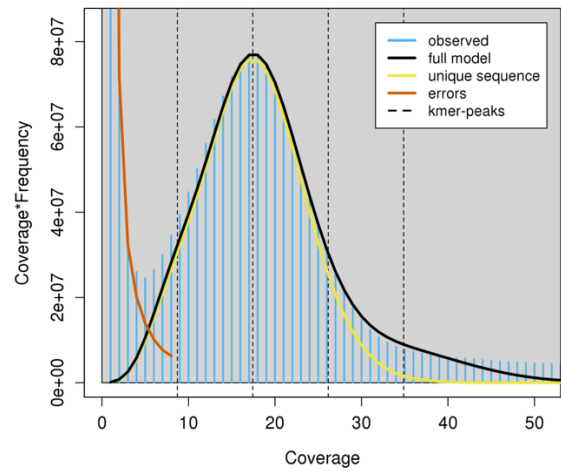

Supplement: supp [file elife_poa_e94948_Figure_13_figure_supplement_1.pdf › elife_poa_e94948_Figure_13_figure_supplement_1.pdf]

Figure 8 – supplement 1.

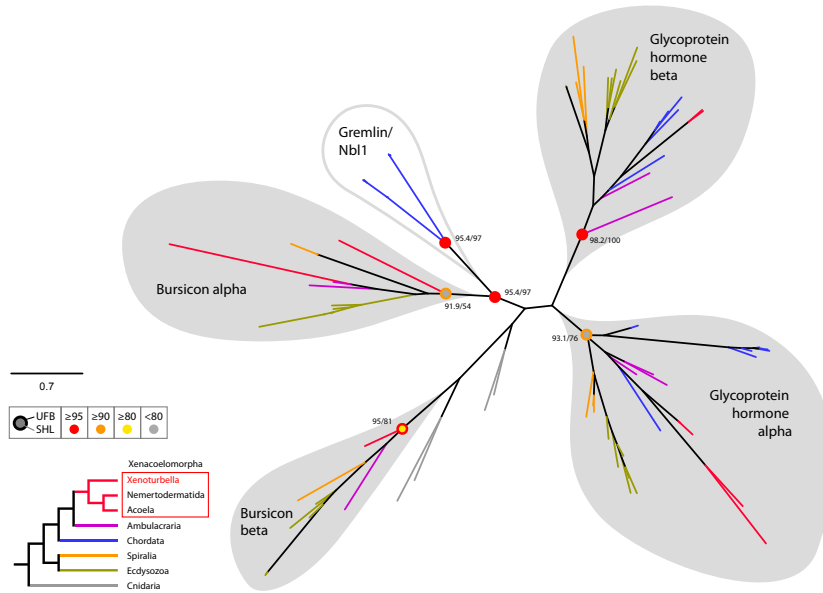

Supplement: supp [file elife_poa_e94948_Figure_8_figure_supplement_1.pdf › elife_poa_e94948_Figure_8_figure_supplement_1.pdf]

Figure 8 – supplement 2.

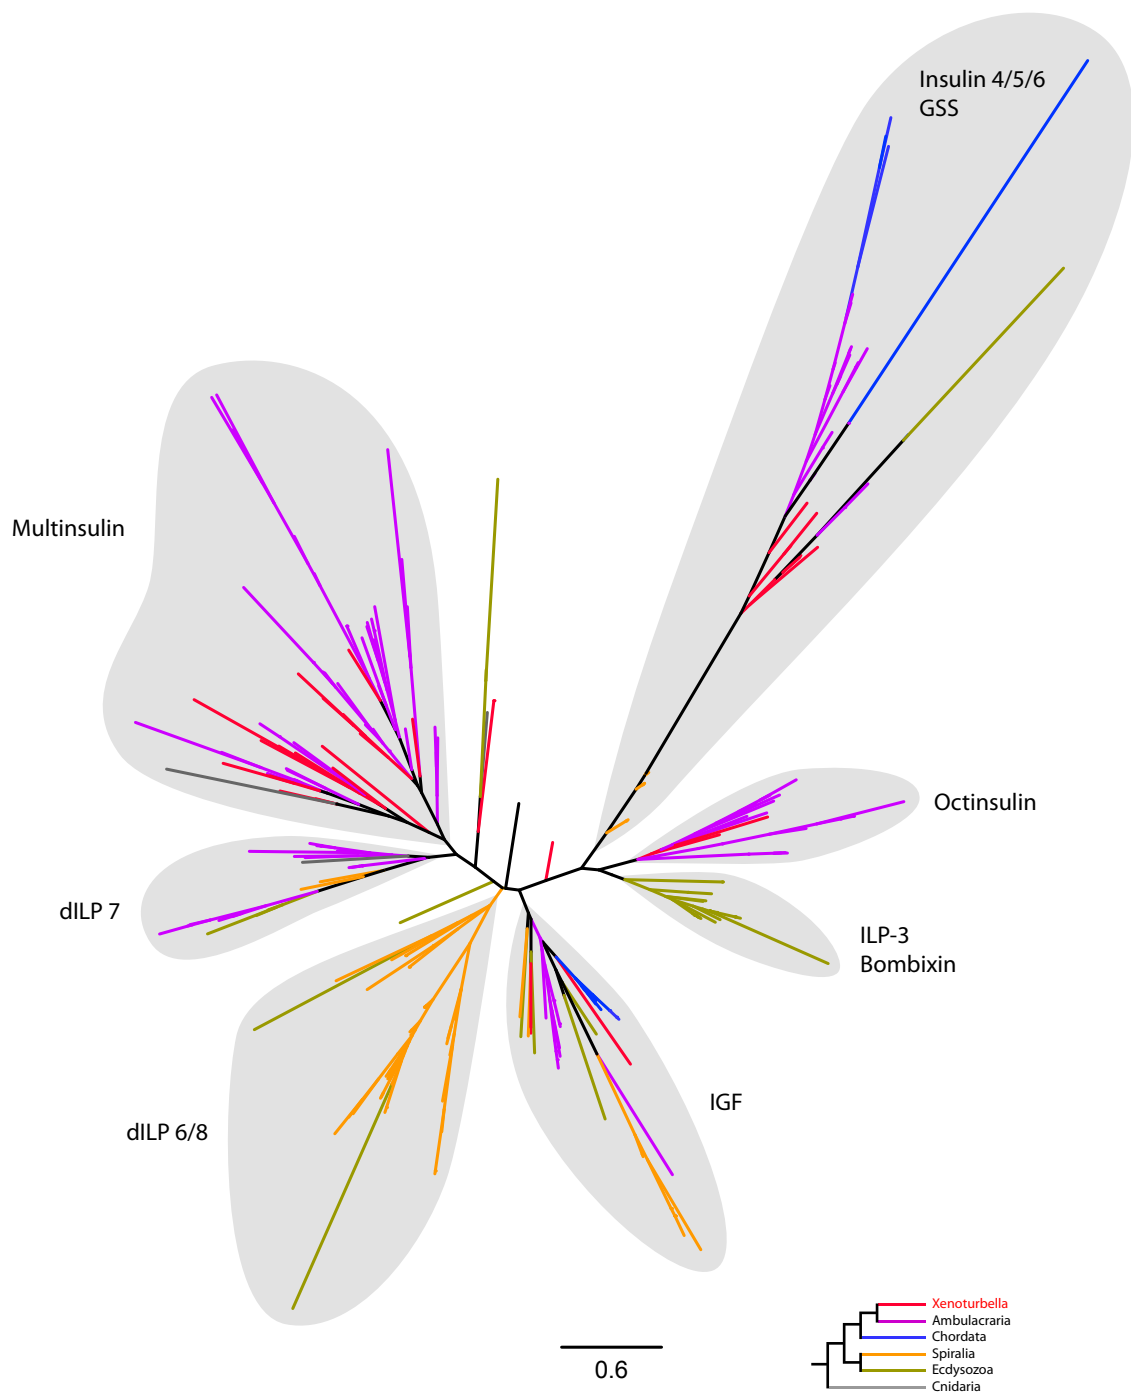

Supplement: supp [file elife_poa_e94948_Figure_8_figure_supplement_2.pdf › elife_poa_e94948_Figure_8_figure_supplement_2.pdf]

**Figure 8 – supplement 5.**

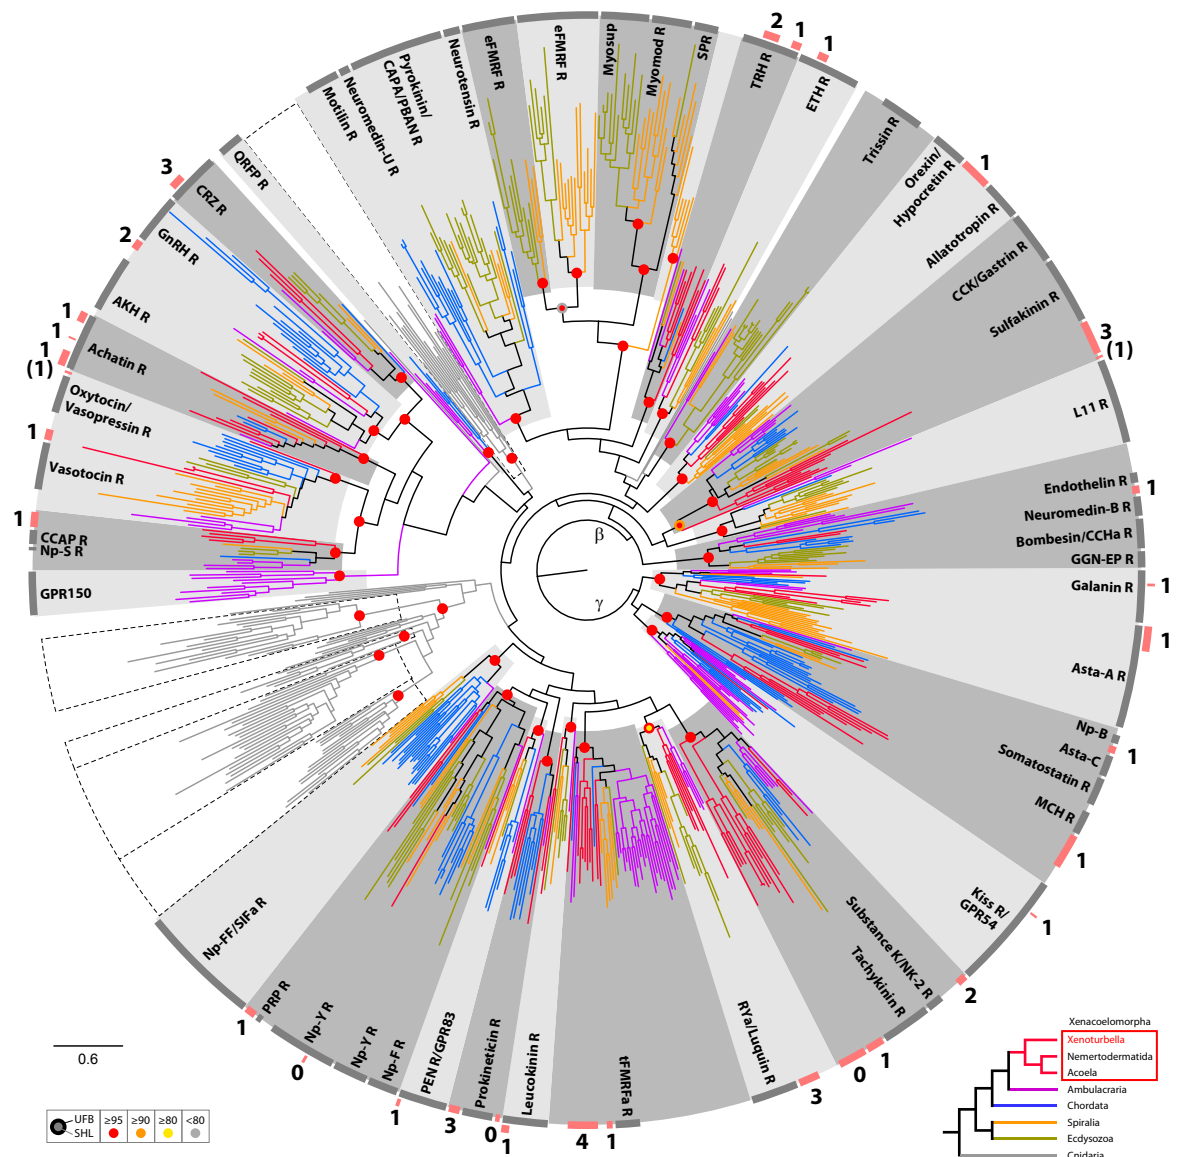

Supplement: supp [file elife_poa_e94948_Figure_8_figure_supplement_5.pdf › elife_poa_e94948_Figure_8_figure_supplement_5.pdf]

Figure 8 – supplement 6.

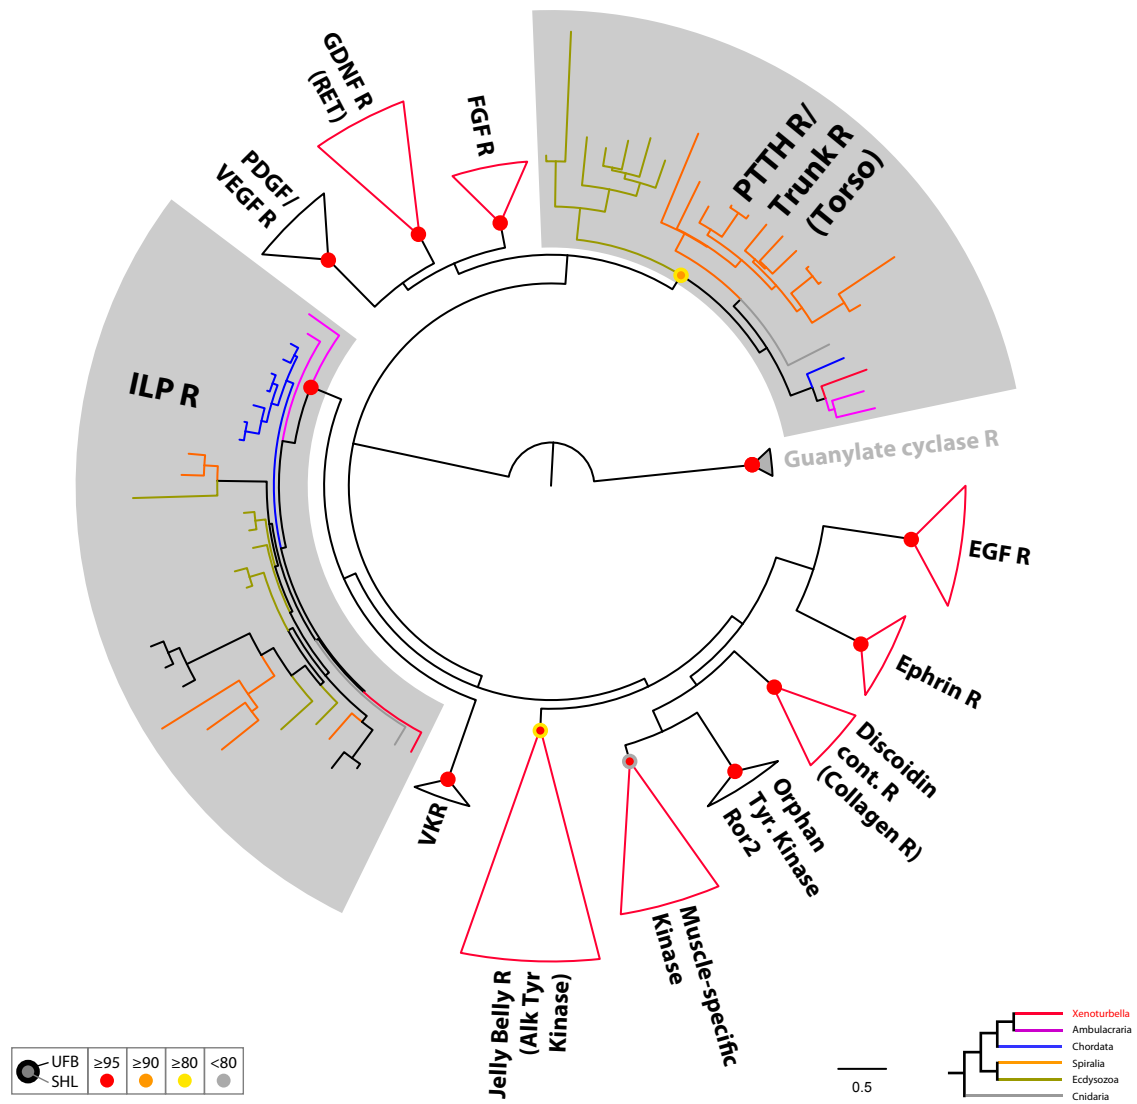

Supplement: supp [file elife_poa_e94948_Figure_8_figure_supplement_6.pdf › elife_poa_e94948_Figure_8_figure_supplement_6.pdf]

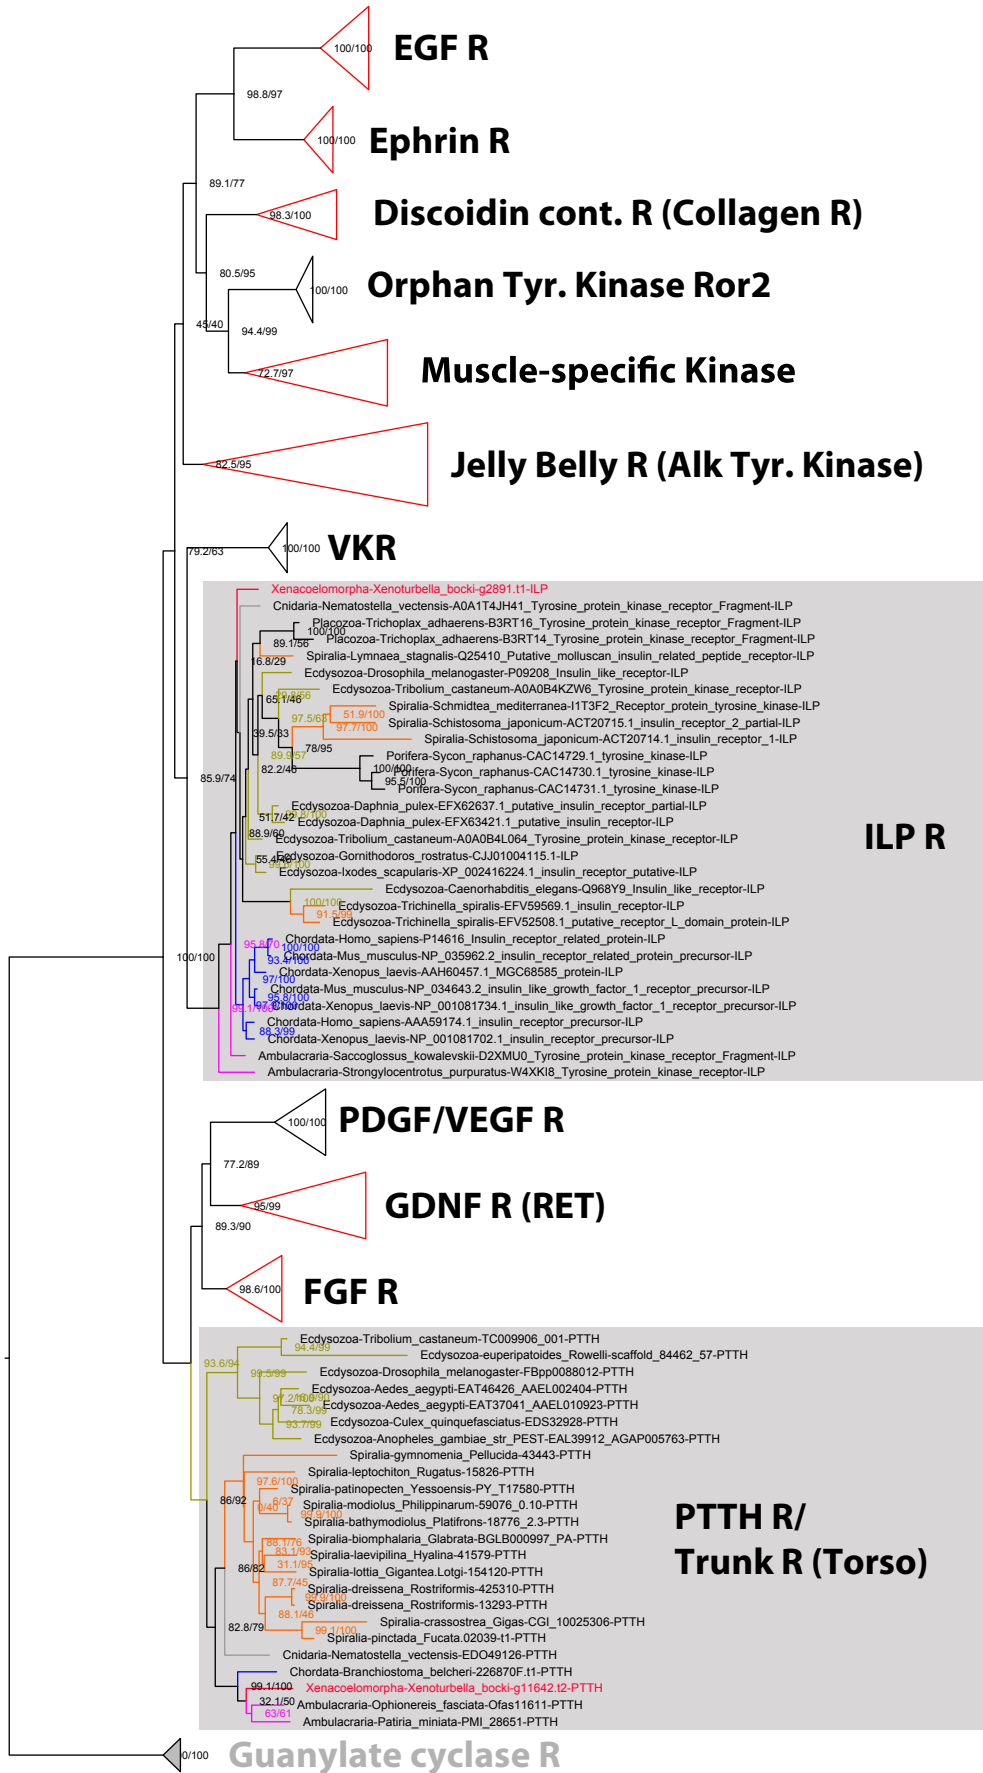

Supplement: supp [file elife_poa_e94948_Figure_8_figure_supplement_7.pdf › elife_poa_e94948_Figure_8_figure_supplement_7.pdf]

Figure 8 – supplement 8.

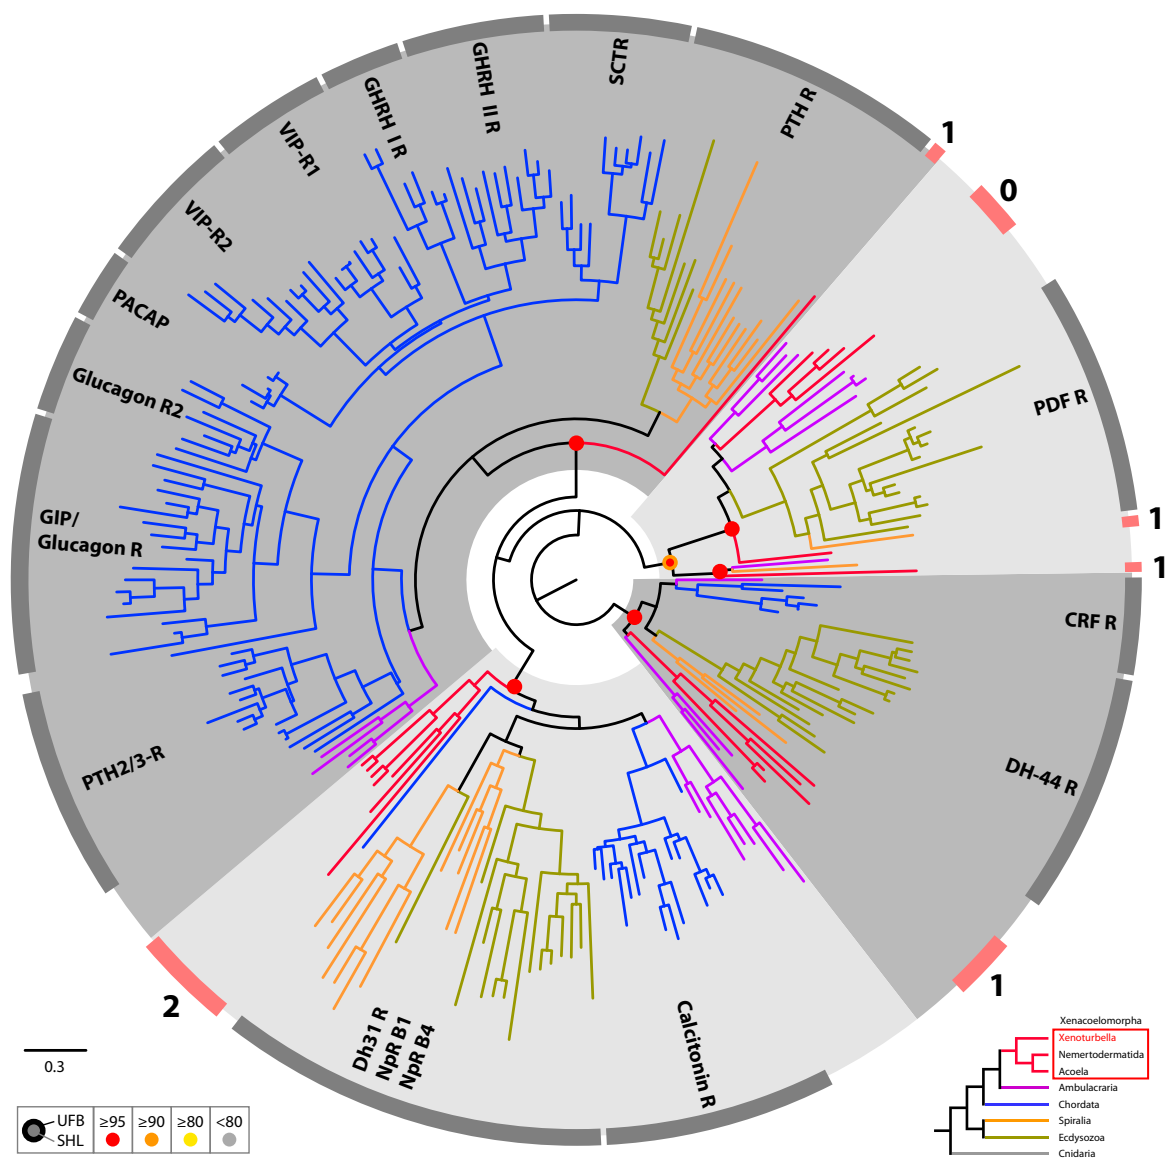

Supplement: supp [file elife_poa_e94948_Figure_8_figure_supplement_8.pdf › elife_poa_e94948_Figure_8_figure_supplement_8.pdf]
